# Supplementary material
Source: PubMed Central journal article supplement (PMC8407042)
Supplement: NIHMS1732032-supplement-Supplementary_Material.pdf [file NIHMS1732032-supplement-Supplementary_Material.pdf]

## Supplementary Materials

### Genome-wide Network-assisted Association and Enrichment Study of Amyloid Imaging Phenotype in Alzheimer's Disease

Jin Li<sup>a</sup>, Feng Chen<sup>a</sup>, Qiushi Zhang<sup>b</sup>, Xianglian Meng<sup>a</sup>, Xiaohui Yao<sup>c</sup>, Shannon L. Risacher<sup>d</sup>, Jingwen Yan<sup>d</sup>, Andrew J. Saykin<sup>d</sup>, Hong Liang<sup>a</sup>, Li Shen<sup>c</sup>, and for the Alzheimer's Disease Neuroimaging Initiative

<sup>a</sup>College of Automation, Harbin Engineering University, Harbin, China; <sup>b</sup>College of Information Engineering, Northeast Dianli University, Jilin, China; <sup>c</sup>Department of Biostatistics, Epidemiology and Informatics, University of Pennsylvania Perelman School of Medicine, Philadelphia, USA; <sup>d</sup>Department of Radiology and Imaging Sciences, Indiana University School of Medicine, Indianapolis, USA.

Table S1: 156 genes appeared in 24 modules identified by DMS. P-values smaller than 0.001 were in bold. Top 10% of each topological centrality were separately bolded in coloured text. **Betweenness**: betweenness centrality, denotes the number of short communication paths that a node participates in; **Closeness**: closeness centrality, corresponds to the average distance (the length of the shortest paths) between a given node and the rest of the network; **PageRank**: PageRank centrality, takes into account the quantity and quality of connections to a given node; **Degree**: degree centrality, counts the number of interactions with a given node; **P-G<sub>1</sub>**: P-value of the gene from GWA analysis of G<sub>1</sub> dataset; **P-G<sub>2</sub>**: P-value of the gene from GWA analysis of G<sub>2</sub> dataset; **DegreeP**: degree of the gene in PPIN; **PCT**: percentage, number of genes with degree larger than the gene divided by the number of all genes; **#M**: number of identified modules containing the gene.

| Gene            | Betweenness  | Closeness    | PageRank     | Degree       | P-G <sub>1</sub> | P-G <sub>2</sub> | DegreeP | PCT(%) | #M |
|-----------------|--------------|--------------|--------------|--------------|------------------|------------------|---------|--------|----|
| <i>APOE</i>     | 0.001        | 0.355        | 0.004        | 0.019        | <b>6.86E-16</b>  | <b>1.28E-06</b>  | 55      | 7.35   | 24 |
| <i>TOMM40</i>   | 0.017        | 0.375        | 0.006        | 0.032        | <b>5.39E-14</b>  | <b>2.49E-06</b>  | 41      | 10.54  | 21 |
| <i>APP</i>      | <b>0.277</b> | <b>0.495</b> | <b>0.040</b> | <b>0.224</b> | 5.27E-03         | 3.73E-02         | 1649    | 0.01   | 20 |
| <i>PARK2</i>    | <b>0.192</b> | <b>0.489</b> | <b>0.031</b> | <b>0.179</b> | 3.66E-03         | 1.21E-03         | 314     | 0.33   | 13 |
| <i>ACTG1</i>    | 0.018        | 0.375        | 0.009        | 0.058        | 1.12E-02         | 1.90E-01         | 111     | 2.48   | 9  |
| <i>ATP5O</i>    | 0.002        | 0.364        | 0.006        | 0.032        | 2.86E-03         | 4.25E-03         | 25      | 18.32  | 8  |
| <i>AARS</i>     | 0.003        | 0.336        | 0.005        | 0.026        | 6.93E-02         | 3.31E-02         | 40      | 10.84  | 5  |
| <i>ACTN1</i>    | 0.002        | 0.342        | 0.005        | 0.026        | 1.19E-02         | 1.20E-01         | 95      | 3.23   | 5  |
| <i>ATP5C1</i>   | 0.003        | 0.373        | 0.005        | 0.026        | 5.34E-03         | 2.80E-01         | 44      | 9.77   | 5  |
| <i>CDK14</i>    | 0.004        | 0.335        | 0.003        | 0.013        | 1.35E-03         | 4.63E-03         | 18      | 24.82  | 5  |
| <i>FBXO18</i>   | 0.000        | 0.335        | 0.003        | 0.013        | <b>3.62E-04</b>  | 9.14E-02         | 11      | 36.21  | 5  |
| <i>HSP90AA1</i> | <b>0.232</b> | <b>0.474</b> | <b>0.037</b> | <b>0.192</b> | 2.92E-01         | 9.35E-02         | 630     | 0.06   | 5  |
| <i>AHSA2</i>    | 0.000        | 0.322        | 0.002        | 0.006        | 1.60E-02         | 2.28E-02         | 1       | 83.60  | 4  |
| <i>ALK</i>      | 0.000        | 0.322        | 0.002        | 0.006        | 1.30E-02         | <b>9.71E-05</b>  | 52      | 7.92   | 4  |
| <i>ABCA3</i>    | 0.000        | 0.292        | 0.002        | 0.006        | 2.74E-02         | 1.07E-01         | 2       | 73.34  | 3  |
| <i>ABL1</i>     | 0.028        | <b>0.411</b> | 0.011        | 0.058        | 1.24E-01         | 8.14E-02         | 287     | 0.42   | 3  |
| <i>ABLIM2</i>   | 0.002        | 0.303        | 0.003        | 0.013        | 1.80E-02         | 5.08E-03         | 4       | 59.37  | 3  |
| <i>ACTA2</i>    | 0.008        | 0.347        | 0.005        | 0.026        | 5.59E-02         | 2.43E-03         | 55      | 7.35   | 3  |
| <i>ADCY9</i>    | 0.000        | 0.292        | 0.002        | 0.006        | 3.32E-03         | 2.67E-03         | 1       | 83.60  | 3  |
| <i>DDAH1</i>    | 0.001        | 0.333        | 0.003        | 0.013        | <b>4.54E-04</b>  | 4.40E-03         | 4       | 59.37  | 3  |
| <i>IKBKE</i>    | 0.016        | 0.366        | <b>0.012</b> | <b>0.071</b> | 2.68E-02         | 4.44E-03         | 299     | 0.38   | 3  |
| <i>NRF1</i>     | <b>0.125</b> | <b>0.412</b> | <b>0.030</b> | <b>0.154</b> | 9.09E-02         | 2.51E-02         | 2053    | 0.00   | 3  |
| <i>PVRL2</i>    | 0.002        | 0.265        | 0.005        | 0.019        | <b>2.46E-06</b>  | <b>1.92E-04</b>  | 11      | 36.21  | 3  |
| <i>ABCA1</i>    | 0.000        | 0.273        | 0.003        | 0.019        | <b>9.07E-04</b>  | 1.23E-02         | 46      | 9.23   | 2  |
| <i>ABCC4</i>    | 0.002        | 0.304        | 0.005        | 0.026        | 2.30E-02         | 6.14E-03         | 7       | 46.48  | 2  |

|                 |              |              |              |              |                 |                 |     |       |   |
|-----------------|--------------|--------------|--------------|--------------|-----------------|-----------------|-----|-------|---|
| <i>ABCF1</i>    | 0.003        | 0.374        | 0.006        | 0.032        | 2.37E-02        | 2.81E-01        | 44  | 9.77  | 2 |
| <i>ABHD10</i>   | 0.000        | 0.351        | 0.003        | 0.013        | 2.50E-03        | 5.15E-02        | 3   | 65.54 | 2 |
| <i>ACSL1</i>    | 0.008        | 0.339        | 0.003        | 0.013        | 7.10E-02        | 3.11E-02        | 5   | 54.41 | 2 |
| <i>AHR</i>      | 0.000        | 0.322        | 0.002        | 0.006        | 3.97E-02        | 5.82E-02        | 34  | 13.02 | 2 |
| <i>ANKS1B</i>   | 0.000        | 0.332        | 0.002        | 0.006        | <b>5.63E-04</b> | 2.07E-02        | 11  | 36.21 | 2 |
| <i>ARHGAP15</i> | 0.002        | 0.271        | 0.004        | 0.013        | 5.73E-03        | 2.16E-03        | 7   | 46.48 | 2 |
| <i>CBX1</i>     | 0.017        | 0.360        | 0.007        | 0.032        | 5.69E-03        | 3.84E-02        | 38  | 11.55 | 2 |
| <i>CUL1</i>     | 0.029        | <b>0.406</b> | <b>0.013</b> | <b>0.071</b> | 2.65E-03        | 2.83E-01        | 515 | 0.12  | 2 |
| <i>DAGLB</i>    | 0.000        | 0.292        | 0.002        | 0.006        | 1.86E-03        | 3.20E-02        | 2   | 73.34 | 2 |
| <i>PRKAB1</i>   | 0.011        | 0.363        | 0.008        | 0.045        | 7.69E-02        | 8.10E-01        | 141 | 1.60  | 2 |
| <i>RNF2</i>     | <b>0.046</b> | <b>0.404</b> | <b>0.018</b> | <b>0.103</b> | 6.30E-02        | <b>5.39E-04</b> | 579 | 0.08  | 2 |
| <i>SMURF1</i>   | <b>0.048</b> | 0.364        | <b>0.013</b> | <b>0.064</b> | 1.17E-03        | 2.81E-03        | 252 | 0.50  | 2 |
| <i>ABR</i>      | 0.015        | 0.350        | 0.004        | 0.019        | 2.67E-02        | <b>1.51E-04</b> | 6   | 50.28 | 1 |
| <i>ACACA</i>    | 0.003        | 0.347        | 0.006        | 0.038        | 1.69E-01        | 6.44E-02        | 57  | 7.02  | 1 |
| <i>ACAP2</i>    | 0.000        | 0.267        | 0.002        | 0.006        | 4.60E-02        | 5.40E-03        | 1   | 83.60 | 1 |
| <i>ACLY</i>     | 0.004        | 0.360        | 0.007        | 0.038        | 7.33E-02        | 1.42E-01        | 34  | 13.02 | 1 |
| <i>ACTR1A</i>   | 0.003        | 0.333        | 0.004        | 0.026        | 1.79E-02        | 4.88E-01        | 25  | 18.32 | 1 |
| <i>ADORA2B</i>  | 0.000        | 0.248        | 0.002        | 0.006        | 4.70E-02        | 1.18E-02        | 7   | 46.48 | 1 |
| <i>AGGF1</i>    | 0.000        | 0.232        | 0.002        | 0.006        | 8.80E-03        | 3.34E-01        | 7   | 46.48 | 1 |
| <i>AIDA</i>     | 0.000        | 0.338        | 0.003        | 0.013        | 8.08E-03        | 1.00E-01        | 4   | 59.37 | 1 |
| <i>ALDH1A2</i>  | 0.000        | 0.277        | 0.002        | 0.006        | 7.61E-02        | 3.39E-02        | 2   | 73.34 | 1 |
| <i>ALDOA</i>    | 0.002        | 0.346        | 0.004        | 0.019        | 2.26E-02        | 2.04E-01        | 46  | 9.23  | 1 |
| <i>AMPH</i>     | 0.000        | 0.280        | 0.003        | 0.013        | 1.67E-03        | 1.69E-02        | 17  | 26.02 | 1 |
| <i>AMY2B</i>    | 0.001        | 0.333        | 0.003        | 0.013        | 8.46E-02        | 7.81E-02        | 2   | 73.34 | 1 |
| <i>ANK3</i>     | 0.001        | 0.299        | 0.003        | 0.013        | 2.55E-03        | 1.80E-02        | 15  | 28.78 | 1 |
| <i>ANXA13</i>   | 0.000        | 0.265        | 0.002        | 0.006        | 3.66E-03        | 1.69E-01        | 3   | 65.54 | 1 |
| <i>ANXA2</i>    | 0.009        | 0.380        | 0.009        | 0.051        | 5.91E-02        | 8.95E-03        | 75  | 4.69  | 1 |
| <i>APC</i>      | 0.007        | 0.354        | 0.006        | 0.032        | 8.23E-02        | 3.23E-02        | 126 | 2.01  | 1 |
| <i>APLF</i>     | 0.011        | 0.362        | 0.004        | 0.026        | 1.72E-01        | 1.32E-01        | 11  | 36.21 | 1 |
| <i>ARHGAP1</i>  | 0.001        | 0.259        | 0.004        | 0.013        | 1.30E-01        | 1.63E-01        | 21  | 21.61 | 1 |
| <i>ARRB1</i>    | 0.025        | <b>0.418</b> | 0.011        | <b>0.064</b> | 3.44E-02        | 3.44E-02        | 217 | 0.70  | 1 |
| <i>ATF7</i>     | 0.000        | 0.256        | 0.002        | 0.006        | 4.27E-03        | 6.97E-02        | 20  | 22.54 | 1 |
| <i>ATG12</i>    | 0.001        | 0.336        | 0.003        | 0.013        | 2.10E-01        | 7.36E-02        | 51  | 8.13  | 1 |
| <i>ATP2B2</i>   | 0.001        | 0.257        | 0.003        | 0.013        | 1.16E-02        | 2.10E-02        | 9   | 40.79 | 1 |
| <i>ATP6VIC1</i> | 0.000        | 0.300        | 0.003        | 0.013        | 1.03E-01        | 2.06E-02        | 40  | 10.84 | 1 |
| <i>BAG3</i>     | 0.002        | 0.334        | 0.005        | 0.026        | 1.53E-01        | 1.38E-01        | 335 | 0.27  | 1 |
| <i>BIRC2</i>    | 0.010        | 0.340        | 0.008        | 0.045        | 4.89E-03        | 3.05E-01        | 81  | 4.14  | 1 |
| <i>BTBD2</i>    | 0.000        | 0.224        | 0.002        | 0.013        | 1.41E-03        | 5.41E-03        | 30  | 15.16 | 1 |
| <i>BZW2</i>     | 0.000        | 0.323        | 0.003        | 0.013        | 1.12E-03        | 6.84E-02        | 18  | 24.82 | 1 |
| <i>CALCOCO2</i> | 0.009        | 0.353        | 0.007        | 0.038        | 1.24E-01        | <b>4.68E-04</b> | 69  | 5.28  | 1 |
| <i>CASP10</i>   | 0.000        | 0.282        | 0.002        | 0.006        | 1.77E-03        | 1.70E-02        | 39  | 11.15 | 1 |
| <i>CASP3</i>    | <b>0.036</b> | <b>0.391</b> | 0.010        | 0.051        | 1.92E-01        | 2.47E-01        | 151 | 1.43  | 1 |
| <i>CBL</i>      | 0.026        | 0.360        | <b>0.013</b> | <b>0.083</b> | 5.20E-03        | 2.30E-01        | 215 | 0.74  | 1 |

|               |              |              |              |              |                 |                 |      |       |   |
|---------------|--------------|--------------|--------------|--------------|-----------------|-----------------|------|-------|---|
| <i>CBLC</i>   | 0.001        | 0.284        | 0.004        | 0.019        | 1.95E-02        | 6.31E-02        | 34   | 13.02 | 1 |
| <i>CD93</i>   | 0.005        | 0.259        | 0.007        | 0.026        | 2.45E-01        | 2.15E-02        | 18   | 24.82 | 1 |
| <i>CDC40</i>  | 0.002        | 0.297        | 0.004        | 0.019        | 3.02E-02        | 1.79E-01        | 20   | 22.54 | 1 |
| <i>CDC6</i>   | 0.001        | 0.257        | 0.004        | 0.013        | 3.30E-01        | 1.79E-01        | 38   | 11.55 | 1 |
| <i>CDH2</i>   | 0.014        | 0.296        | 0.006        | 0.026        | 7.72E-03        | 9.03E-02        | 60   | 6.53  | 1 |
| <i>CDH4</i>   | 0.000        | 0.229        | 0.002        | 0.006        | <b>7.91E-04</b> | 3.98E-03        | 2    | 73.34 | 1 |
| <i>CFTR</i>   | <b>0.035</b> | 0.379        | <b>0.012</b> | <b>0.064</b> | 1.98E-01        | 5.46E-01        | 174  | 1.09  | 1 |
| <i>CHD1L</i>  | 0.009        | 0.284        | 0.005        | 0.019        | 7.93E-02        | 1.19E-01        | 20   | 22.54 | 1 |
| <i>CHMP1B</i> | 0.002        | 0.306        | 0.003        | 0.013        | 3.96E-01        | 7.95E-02        | 16   | 27.31 | 1 |
| <i>CISD1</i>  | 0.009        | 0.363        | 0.008        | 0.038        | 5.36E-01        | 4.35E-02        | 8    | 43.39 | 1 |
| <i>CNTN2</i>  | 0.000        | 0.279        | 0.003        | 0.013        | 1.96E-02        | 3.70E-02        | 30   | 15.16 | 1 |
| <i>COL4A1</i> | 0.007        | 0.336        | 0.005        | 0.019        | 3.71E-03        | 1.43E-03        | 27   | 17.03 | 1 |
| <i>COL4A2</i> | 0.007        | 0.336        | 0.005        | 0.019        | 7.75E-03        | 3.90E-02        | 22   | 20.75 | 1 |
| <i>CUX1</i>   | 0.000        | 0.232        | 0.002        | 0.006        | 7.83E-03        | <b>1.30E-04</b> | 24   | 19.09 | 1 |
| <i>DBN1</i>   | 0.008        | 0.305        | 0.007        | 0.032        | 1.01E-02        | 3.43E-01        | 55   | 7.35  | 1 |
| <i>DMRTA1</i> | 0.005        | 0.331        | 0.004        | 0.019        | 2.84E-01        | 1.75E-01        | 4    | 59.37 | 1 |
| <i>DOK5</i>   | 0.000        | 0.264        | 0.002        | 0.006        | 1.20E-02        | <b>8.30E-04</b> | 8    | 43.39 | 1 |
| <i>DOK6</i>   | 0.000        | 0.264        | 0.002        | 0.006        | 3.39E-02        | <b>3.79E-04</b> | 3    | 65.54 | 1 |
| <i>DPP4</i>   | 0.015        | 0.288        | 0.008        | 0.038        | 4.69E-01        | 1.72E-01        | 13   | 31.99 | 1 |
| <i>ECT2</i>   | <b>0.030</b> | 0.302        | <b>0.012</b> | 0.058        | 3.64E-03        | 3.47E-01        | 125  | 2.04  | 1 |
| <i>EEF2K</i>  | 0.009        | 0.339        | 0.007        | 0.038        | 2.96E-03        | 5.59E-02        | 129  | 1.94  | 1 |
| <i>ELAVL1</i> | <b>0.100</b> | <b>0.420</b> | <b>0.025</b> | <b>0.141</b> | 5.16E-03        | 3.69E-01        | 1344 | 0.02  | 1 |
| <i>EPHA2</i>  | 0.004        | <b>0.391</b> | 0.006        | 0.032        | 4.39E-02        | 3.75E-03        | 34   | 13.02 | 1 |
| <i>ESRRB</i>  | 0.000        | 0.333        | 0.003        | 0.013        | 1.95E-03        | 1.20E-01        | 6    | 50.28 | 1 |
| <i>ESRRG</i>  | 0.000        | 0.361        | 0.003        | 0.013        | 1.57E-03        | 6.28E-03        | 24   | 19.09 | 1 |
| <i>FMNL1</i>  | 0.005        | 0.369        | 0.006        | 0.032        | 2.58E-01        | 5.39E-01        | 54   | 7.57  | 1 |
| <i>FOS</i>    | 0.015        | 0.343        | 0.006        | 0.026        | 1.20E-01        | 3.88E-01        | 130  | 1.90  | 1 |
| <i>GABRR1</i> | 0.000        | 0.258        | 0.002        | 0.006        | 9.92E-02        | 4.07E-02        | 13   | 31.99 | 1 |
| <i>GPD2</i>   | 0.000        | 0.330        | 0.003        | 0.013        | 2.61E-01        | 1.84E-02        | 3    | 65.54 | 1 |
| <i>GRIA1</i>  | 0.000        | 0.265        | 0.002        | 0.013        | 1.37E-03        | <b>4.11E-04</b> | 26   | 17.67 | 1 |
| <i>GSK3B</i>  | 0.022        | <b>0.407</b> | <b>0.012</b> | <b>0.071</b> | 1.74E-01        | 4.00E-02        | 276  | 0.44  | 1 |
| <i>HSDL2</i>  | 0.003        | 0.356        | 0.005        | 0.026        | 4.06E-01        | 3.39E-02        | 6    | 50.28 | 1 |
| <i>HTRA2</i>  | <b>0.030</b> | <b>0.382</b> | 0.010        | 0.051        | 8.85E-01        | 9.32E-02        | 40   | 10.84 | 1 |
| <i>IL7R</i>   | 0.004        | 0.350        | 0.007        | 0.038        | 2.57E-02        | 1.74E-03        | 84   | 3.85  | 1 |
| <i>ILF3</i>   | 0.009        | 0.373        | 0.008        | 0.045        | 2.12E-02        | 4.72E-01        | 230  | 0.64  | 1 |
| <i>INO80C</i> | 0.001        | 0.333        | 0.003        | 0.013        | <b>1.97E-04</b> | 6.00E-02        | 16   | 27.31 | 1 |
| <i>ITPR1</i>  | 0.001        | 0.263        | 0.004        | 0.013        | 1.31E-03        | 1.65E-02        | 37   | 11.94 | 1 |
| <i>KLHL6</i>  | 0.000        | 0.322        | 0.002        | 0.006        | 2.04E-01        | 5.05E-03        | 2    | 73.34 | 1 |
| <i>MAPK3</i>  | 0.004        | 0.318        | 0.006        | 0.032        | 3.66E-02        | 1.51E-01        | 159  | 1.27  | 1 |
| <i>MAPK6</i>  | 0.026        | 0.342        | 0.010        | 0.051        | 1.30E-01        | 1.63E-01        | 139  | 1.63  | 1 |
| <i>MGMT</i>   | 0.001        | 0.332        | 0.004        | 0.019        | 9.17E-03        | 4.47E-03        | 59   | 6.67  | 1 |
| <i>MYLK4</i>  | 0.000        | 0.322        | 0.002        | 0.006        | 1.86E-01        | 2.54E-03        | 3    | 65.54 | 1 |
| <i>MYO1D</i>  | 0.010        | 0.322        | 0.004        | 0.019        | 1.62E-03        | 1.20E-03        | 21   | 21.61 | 1 |

|                 |              |              |              |              |                 |                 |     |       |   |
|-----------------|--------------|--------------|--------------|--------------|-----------------|-----------------|-----|-------|---|
| <i>NCOA3</i>    | 0.008        | 0.350        | 0.008        | 0.045        | 4.04E-03        | 3.24E-02        | 98  | 3.08  | 1 |
| <i>NDFIP1</i>   | 0.005        | 0.318        | 0.006        | 0.032        | 1.26E-01        | 2.04E-01        | 7   | 46.48 | 1 |
| <i>NEDD4</i>    | <b>0.037</b> | 0.360        | <b>0.014</b> | <b>0.071</b> | 6.13E-03        | 2.74E-02        | 232 | 0.64  | 1 |
| <i>NEDD4L</i>   | 0.002        | 0.331        | 0.005        | 0.026        | 7.39E-03        | 1.50E-02        | 132 | 1.82  | 1 |
| <i>NR4A2</i>    | 0.000        | 0.306        | 0.003        | 0.013        | 2.79E-01        | 1.95E-01        | 25  | 18.32 | 1 |
| <i>ORC5</i>     | 0.004        | 0.282        | 0.006        | 0.026        | 8.03E-02        | 6.47E-02        | 27  | 17.03 | 1 |
| <i>OXCT1</i>    | 0.000        | 0.276        | 0.004        | 0.019        | 2.07E-01        | 5.68E-03        | 34  | 13.02 | 1 |
| <i>PAG1</i>     | 0.000        | 0.300        | 0.003        | 0.013        | 2.85E-02        | <b>1.78E-04</b> | 18  | 24.82 | 1 |
| <i>PARD3</i>    | 0.002        | 0.290        | 0.003        | 0.019        | 1.59E-02        | 1.87E-03        | 59  | 6.67  | 1 |
| <i>PDZK1</i>    | <b>0.030</b> | 0.354        | 0.008        | 0.038        | 1.10E-01        | 1.01E-01        | 28  | 16.40 | 1 |
| <i>PLEKHF2</i>  | 0.008        | 0.357        | 0.005        | 0.026        | 4.60E-02        | 3.10E-02        | 29  | 15.84 | 1 |
| <i>PSKH1</i>    | 0.027        | 0.332        | 0.007        | 0.026        | 2.83E-01        | 9.29E-02        | 5   | 54.41 | 1 |
| <i>PSMA1</i>    | 0.005        | <b>0.385</b> | 0.008        | 0.045        | 2.35E-03        | 4.69E-02        | 99  | 3.01  | 1 |
| <i>PSME2</i>    | 0.020        | <b>0.389</b> | 0.010        | 0.058        | 9.25E-01        | 1.76E-02        | 35  | 12.75 | 1 |
| <i>PTEN</i>     | 0.026        | 0.360        | 0.009        | 0.051        | 7.76E-02        | 5.96E-01        | 81  | 4.14  | 1 |
| <i>PTPRF</i>    | 0.000        | 0.264        | 0.002        | 0.013        | 3.55E-03        | 4.62E-02        | 25  | 18.32 | 1 |
| <i>PTPRO</i>    | 0.024        | 0.360        | 0.008        | 0.058        | 4.61E-02        | <b>4.54E-04</b> | 26  | 17.67 | 1 |
| <i>RDH13</i>    | 0.000        | 0.250        | 0.002        | 0.006        | 5.27E-02        | 6.03E-03        | 3   | 65.54 | 1 |
| <i>RET</i>      | <b>0.048</b> | 0.357        | <b>0.012</b> | 0.058        | 1.29E-01        | 2.45E-03        | 37  | 11.94 | 1 |
| <i>RNF141</i>   | 0.001        | 0.276        | 0.003        | 0.019        | 2.54E-01        | <b>2.75E-04</b> | 3   | 65.54 | 1 |
| <i>SCYL1</i>    | 0.000        | 0.226        | 0.004        | 0.013        | 2.21E-01        | 5.66E-01        | 5   | 54.41 | 1 |
| <i>SEPT11</i>   | 0.019        | 0.347        | 0.009        | 0.045        | 1.85E-01        | 1.45E-01        | 29  | 15.84 | 1 |
| <i>SEPT9</i>    | 0.021        | 0.366        | 0.007        | 0.038        | 5.78E-02        | 1.13E-02        | 39  | 11.15 | 1 |
| <i>SH3GL2</i>   | 0.017        | 0.354        | 0.007        | 0.038        | 3.24E-02        | <b>4.76E-05</b> | 54  | 7.57  | 1 |
| <i>SH3GL3</i>   | 0.003        | 0.294        | 0.006        | 0.032        | 3.86E-03        | 7.01E-02        | 39  | 11.15 | 1 |
| <i>SLC11A2</i>  | 0.004        | 0.345        | 0.005        | 0.026        | 1.21E-01        | 4.05E-02        | 6   | 50.28 | 1 |
| <i>SLC22A4</i>  | 0.000        | 0.271        | 0.003        | 0.013        | 3.64E-01        | 1.09E-01        | 4   | 59.37 | 1 |
| <i>SLC9A3R2</i> | <b>0.043</b> | 0.329        | <b>0.014</b> | <b>0.064</b> | 6.97E-02        | 8.72E-02        | 52  | 7.92  | 1 |
| <i>SLCO3A1</i>  | 0.000        | 0.248        | 0.002        | 0.006        | <b>6.78E-04</b> | 3.79E-03        | 3   | 65.54 | 1 |
| <i>SNTA1</i>    | 0.010        | 0.301        | 0.009        | 0.045        | 1.41E-01        | <b>5.11E-04</b> | 71  | 5.08  | 1 |
| <i>SREBF2</i>   | 0.003        | 0.322        | 0.005        | 0.026        | <b>3.46E-04</b> | <b>8.66E-04</b> | 55  | 7.35  | 1 |
| <i>STARD13</i>  | 0.023        | 0.354        | 0.007        | 0.032        | 3.15E-03        | 1.08E-02        | 14  | 30.43 | 1 |
| <i>STAT5B</i>   | 0.006        | 0.358        | 0.006        | 0.032        | 3.60E-02        | 7.25E-02        | 63  | 6.12  | 1 |
| <i>STYK1</i>    | 0.000        | 0.331        | 0.003        | 0.013        | 3.69E-01        | 5.40E-03        | 3   | 65.54 | 1 |
| <i>SUCLA2</i>   | 0.006        | 0.307        | 0.004        | 0.019        | 1.51E-01        | 4.79E-02        | 15  | 28.78 | 1 |
| <i>SUCLG1</i>   | 0.009        | 0.300        | 0.009        | 0.051        | 8.25E-01        | 6.59E-02        | 11  | 36.21 | 1 |
| <i>SUCLG2</i>   | 0.001        | 0.279        | 0.004        | 0.019        | 2.74E-02        | 3.19E-02        | 18  | 24.82 | 1 |
| <i>TAX1BP1</i>  | <b>0.036</b> | 0.347        | 0.011        | 0.051        | 1.17E-01        | 9.31E-02        | 23  | 20.00 | 1 |
| <i>TGM3</i>     | 0.014        | 0.341        | 0.007        | 0.038        | 1.31E-01        | 1.17E-02        | 8   | 43.39 | 1 |
| <i>TPM4</i>     | 0.016        | 0.352        | 0.006        | 0.032        | 1.24E-01        | 1.28E-02        | 38  | 11.55 | 1 |
| <i>TRIM24</i>   | 0.003        | 0.308        | 0.004        | 0.019        | 8.27E-02        | 2.48E-03        | 37  | 11.94 | 1 |
| <i>U2AF1</i>    | 0.006        | 0.348        | 0.006        | 0.032        | <b>2.63E-04</b> | 1.11E-01        | 83  | 3.95  | 1 |
| <i>USP53</i>    | 0.001        | 0.261        | 0.003        | 0.013        | 3.87E-02        | 2.11E-01        | 21  | 21.61 | 1 |

|               |       |       |       |       |                 |          |     |       |   |
|---------------|-------|-------|-------|-------|-----------------|----------|-----|-------|---|
| <i>WFOX</i>   | 0.002 | 0.316 | 0.005 | 0.026 | <b>1.61E-04</b> | 1.56E-03 | 198 | 0.89  | 1 |
| <i>ZNF787</i> | 0.005 | 0.349 | 0.006 | 0.032 | 2.02E-01        | 5.22E-02 | 5   | 54.41 | 1 |
